# Supplementary material for: Late Local Recurrence of Bone Giant Cell Tumors Associated with an Increased Risk for Malignant Transformation
Source: MDPI journal article supplement (doi:10.3390/cancers13143644), 2021-07-20
Supplement: s1 [file s1]

## Supplementary Materials

**Table S1.** Details of the 26 patients who experienced lung metastases without malignant transformation.

| Case | Age | Sex | Location of tumor | Campanacci classification | Previous surgery | Lung metastasis at presentation | Surgery for primary tumor | Pre- and postoperative denosumab treatment | Local recurrence | Interval between surgery of primary tumor and discovery of lung metastasis (months) | Treatment for lung lesions | Follow-up period from surgery for primary tumor (months) | Status |
|------|-----|-----|-------------------|---------------------------|------------------|---------------------------------|---------------------------|--------------------------------------------|------------------|-------------------------------------------------------------------------------------|----------------------------|----------------------------------------------------------|--------|
| 1    | 32  | F   | Distal femur      | Stage 3                   | No               | Yes                             | Resection                 | No                                         | No               | 0                                                                                   | Observation                | 34                                                       | AWD    |
| 2    | 26  | F   | Distal radius     | Stage 3                   | No               | Yes                             | Resection                 | No                                         | Yes              | 0                                                                                   | Metastasectomy             | 42                                                       | AWD    |
| 3    | 35  | M   | Proximal tibia    | Stage 2                   | Yes              | No                              | Resection                 | No                                         | No               | 124                                                                                 | Observation                | 400                                                      | AWD    |
| 4    | 47  | M   | Distal femur      | Stage 3                   | No               | No                              | Resection                 | No                                         | No               | 43                                                                                  | Observation                | 173                                                      | AWD    |
| 5    | 20  | F   | Distal radius     | Stage 3                   | No               | No                              | Resection                 | No                                         | No               | 35                                                                                  | Observation                | 89                                                       | AWD    |
| 6    | 24  | F   | Distal radius     | Stage 3                   | No               | No                              | Resection                 | No                                         | Yes              | 11                                                                                  | Metastasectomy             | 139                                                      | NED    |
| 7    | 54  | F   | Phalanx           | Stage 2                   | No               | No                              | Resection                 | No                                         | Yes              | 22                                                                                  | Observation                | 42                                                       | AWD    |
| 8    | 51  | F   | Distal radius     | Stage 3                   | Yes              | Yes                             | Resection                 | No                                         | Yes              | 0                                                                                   | Observation                | 134                                                      | AWD    |
| 9    | 63  | M   | Proximal femur    | Stage 2                   | No               | No                              | Resection                 | No                                         | Yes              | 35                                                                                  | Metastasectomy             | 97                                                       | AWD    |
| 10   | 27  | F   | Proximal tibia    | Stage 3                   | No               | No                              | Resection                 | No                                         | No               | 24                                                                                  | Metastasectomy             | 181                                                      | NED    |
| 11   | 27  | M   | Proximal humerus  | Stage 3                   | No               | No                              | Resection                 | No                                         | No               | 11                                                                                  | Metastasectomy             | 136                                                      | AWD    |

|    |    |   |                 |         |     |     |            |    |     |     |                                    |     |      |
|----|----|---|-----------------|---------|-----|-----|------------|----|-----|-----|------------------------------------|-----|------|
| 12 | 39 | M | Proximal fibula | Stage 3 | Yes | Yes | Amputation | No | No  | 0   | Metastasectomy                     | 66  | DOOD |
| 13 | 17 | F | Proximal tibia  | Stage 3 | No  | Yes | Resection  | No | No  | 0   | Chemotherapy and denosumab therapy | 118 | AWD  |
| 14 | 33 | M | Proximal tibia  | Stage 3 | Yes | No  | Resection  | No | No  | 64  | Observation                        | 114 | AWD  |
| 15 | 23 | F | Distal femur    | Stage 2 | No  | No  | Curettage  | No | No  | 34  | Metastasectomy                     | 81  | NED  |
| 16 | 38 | F | Distal femur    | Stage 2 | Yes | No  | Resection  | No | No  | 11  | Metastasectomy                     | 141 | NED  |
| 17 | 28 | F | Metacarpal      | Stage 3 | No  | No  | Resection  | No | Yes | 30  | Metastasectomy                     | 118 | NED  |
| 18 | 22 | M | Distal radius   | Stage 3 | No  | No  | Resection  | No | Yes | 114 | Metastasectomy                     | 223 | NED  |
| 19 | 31 | F | Metatarsal      | Stage 3 | Yes | Yes | Resection  | No | No  | 0   | Observation                        | 71  | AWD  |
| 20 | 32 | M | Metacarpal      | Stage 3 | No  | No  | Resection  | No | No  | 23  | Observation                        | 76  | AWD  |
| 21 | 37 | M | Proximal tibia  | Stage 3 | No  | No  | Curettage  | No | No  | 46  | Observation                        | 120 | AWD  |
| 22 | 24 | F | Proximal fibula | Stage 3 | No  | No  | Resection  | No | Yes | 44  | Observation                        | 73  | AWD  |
| 23 | 25 | M | Proximal tibia  | Stage 2 | No  | No  | Curettage  | No | Yes | 10  | Observation                        | 150 | AWD  |
| 24 | 28 | F | Distal humerus  | Stage 3 | Yes | Yes | Curettage  | No | No  | 0   | Metastasectomy                     | 183 | NED  |
| 25 | 27 | M | Distal radius   | Stage 3 | Yes | No  | Resection  | No | Yes | 292 | Metastasectomy                     | 312 | NED  |
| 26 | 18 | M | Distal radius   | Stage 3 | No  | No  | Resection  | No | No  | 17  | Observation                        | 63  | DOD  |

NED, no evidence of disease; AWD, alive with disease; DOD, death of disease; DOOD, death of other disease

**Table S2.** Characteristics of patients excluded from this study because they received denosumab.

| <b>Variable (n = 36)</b>  | <b>No. of patients</b> |
|---------------------------|------------------------|
| Age (years)               |                        |
| Median                    | 36.8                   |
| Interquartile range       | 26.0-45.2              |
| Sex                       |                        |
| Male                      | 16 (44.4%)             |
| Female                    | 20 (55.6%)             |
| Site                      |                        |
| Distal radius             | 13 (36.1%)             |
| Proximal femur            | 1 (2.8%)               |
| Distal femur              | 5 (13.9%)              |
| Proximal tibia            | 7 (19.4%)              |
| Distal tibia              | 2 (5.6%)               |
| Proximal humerus          | 5 (13.9%)              |
| Others                    | 3 (8.3%)               |
| Campanacci classification |                        |
| Stage II                  | 16 (44.4%)             |
| Stage III                 | 20 (55.6%)             |
| Previous surgery          |                        |
| None                      | 30 (83.3%)             |
| 1                         | 6 (16.7%)              |
| Surgery                   |                        |
| No surgery                | 1 (2.8%)               |
| Curettage                 | 30 (83.3%)             |
| Resection                 | 5 (13.9%)              |
| Local recurrence          |                        |
| None                      | 15 (41.7%)             |
| 1                         | 14 (38.9%)             |
| ≥2                        | 7 (19.4%)              |
| Lung metastasis           |                        |
| None                      | 31 (86.1%)             |
| Synchronous               | 1 (2.8%)               |
| Metachronous              | 4 (11.1%)              |
| Malignant transformation  |                        |

**Table S3.** Details of two patients who received surgery combined with denosumab treatment and experienced malignant transformation.

| Case | Sex                               | Age                                                | Site                                                                                 | Campanacci stage                                                                                        | Lung metastasis at presentation                   | Previous surgery             | Denosumab treatment | Surgery                                                    |
|------|-----------------------------------|----------------------------------------------------|--------------------------------------------------------------------------------------|---------------------------------------------------------------------------------------------------------|---------------------------------------------------|------------------------------|---------------------|------------------------------------------------------------|
| 16   | M                                 | 64                                                 | Distal radius                                                                        | Stage 3                                                                                                 | No                                                | No                           | Yes*                | None                                                       |
| 17   | F                                 | 71                                                 | Proximal humerus                                                                     | Stage 3                                                                                                 | No                                                | No                           | Yes                 | Resection                                                  |
| Case | Total number of local recurrences | Histology of malignant GCTB (H3F3A G34W mutation ) | Interval between initial surgery of benign GCTB and malignant transformation (years) | Interval between last surgery of benign GCTB and local recurrence with malignant transformation (years) | Distant metastases at diagnosis of malignant GCTB | Treatment for malignant GCTB | Status              | Follow-up period from diagnosis of malignant GCTB (months) |
| 16   | 1                                 | UPS (negative)                                     | 8.3                                                                                  | 8.3                                                                                                     | Yes                                               | Amputation                   | AWD                 | 2                                                          |
| 17   | 2                                 | Osteosarcoma (negative)                            | 4                                                                                    | 4                                                                                                       | Yes                                               | Palliative CHT, amputation   | DOD                 | 16                                                         |

GCTB, giant cell tumor of bone; UPS, undifferentiated pleomorphic sarcoma; AWD, alive with disease; DOD, dead of disease; CHT, chemotherapy\*Denosumab treatment alone.
